# Supplementary material for: Confirmation of translatability and functionality certifies the dual endothelin1/VEGFsp receptor (DEspR) protein
Source: PubMed Central journal article supplement (PMC4906906; doi:10.1186/s12867-016-0066-8), 2016-06-14
Supplement: 12867_2016_66_MOESM1_ESM.pdf [file 12867_2016_66_MOESM1_ESM.pdf]

**Figure S1.** NCBI Designation of DEspR (*Dear*) as pseudogene

<http://www.ncbi.nlm.nih.gov/gene/102191832>[5/16/2016 4:05:57 PM]

**DEAR dual endothelin-1(VEGFsp)/angiotensin II receptor pseudogene [ *Homo sapiens* (human) ]**

Gene ID: 102191832, updated on 7-May-2016

|                               |                                                                                                                                                                                                                  |
|-------------------------------|------------------------------------------------------------------------------------------------------------------------------------------------------------------------------------------------------------------|
| <b>Gene symbol</b>            | DEAR                                                                                                                                                                                                             |
| <b>Gene description</b>       | dual endothelin-1(VEGFsp)/angiotensin II receptor pseudogene                                                                                                                                                     |
| <b>See related</b>            | <a href="#">Ensembl:ENSG00000270751</a>                                                                                                                                                                          |
| <b>Gene type</b>              | pseudo                                                                                                                                                                                                           |
| <b>RefSeq status</b>          | VALIDATED                                                                                                                                                                                                        |
| <b>Organism</b>               | <i>Homo sapiens</i>                                                                                                                                                                                              |
| <b>Lineage</b>                | Eukaryota; Metazoa; Chordata; Craniata; Vertebrata; Euteleostomi; Mammalia; Eutheria; Euarchontoglires; Primates; Haplorrhini; Catarrhini; Hominidae; Homo                                                       |
| <b>Also known as</b>          | DEspR                                                                                                                                                                                                            |
| <b>Annotation information</b> | Note: The human DEAR gene is represented as a transcribed pseudogene based on abundance of available evidence. There is a conflicting report about this gene being protein-coding (PMID:17446437). [04 Nov 2013] |
