# Supplementary material for: Confirmation of translatability and functionality certifies the dual endothelin1/VEGFsp receptor (DEspR) protein
Source: PubMed Central journal article supplement (PMC4906906; doi:10.1186/s12867-016-0066-8), 2016-06-14
Supplement: 12867_2016_66_MOESM3_ESM.pdf [file 12867_2016_66_MOESM3_ESM.pdf]

**Figure S3. Some RNA-Seq sequences show two G's with extra "A" or "TA"**

1) HEK46AV01A5IHP. Sequence ID: **gnl|SRA|ERR169824.68765.1** Length: 895 Number of Matches: 1  
Range 1: 409 to 699 [\[truncated sbj ct 580 – 699\]](#)

| Score         | Expect                                                      | Identities   | Gaps      | Strand     | Frame |
|---------------|-------------------------------------------------------------|--------------|-----------|------------|-------|
| 525 bits(284) | 5e-145()                                                    | 289/291(99%) | 2/291(0%) | Plus/Minus |       |
| Query 82      | AGGGAGC-AATGAAATGAAGTCTCGTTGG-AACTGGGGTTCATCACTTGCATCATATGT | 139          |           |            |       |
| Sbjct 699     | AGGGAGCAAATGAAATGAAGTCTCGTTGGAAACTGGGGTTCATCACTTGCATCATATGT | 640          |           |            |       |
| Query 140     | TTTACTTGTGTTGGTTCACAACATCAATGAGTTCATCTAAAGCAAGCAATTTCTCTGGT | 199          |           |            |       |
| Sbjct 639     | TTTACTTGTGTTGGTTCACAACATCAATGAGTTCATCTAAAGCAAGCAATTTCTCTGGT | 580          |           |            |       |

2) E56FR8H01C88XQ. Sequence ID: **gnl|SRA|SRR013993.103029.2** Length: 226 Number of Matches: 1  
Range 1: 74 to 212 [\[truncated 93-212\]](#)

| Score         | Expect                                                       | Identities   | Gaps      | Strand     | Frame |
|---------------|--------------------------------------------------------------|--------------|-----------|------------|-------|
| 195 bits(105) | 2e-45()                                                      | 129/139(93%) | 8/139(5%) | Plus/Minus |       |
| Query 82      | AGGGAGC-AATGAAATGAAGTCTCGTTGG--AACTGGGGTTC-TATCACTTGCATCATAT | 137          |           |            |       |
| Sbjct 212     | AGGTAGCGAATGAAATGAAGTCTCGTTGGTAACCTGGGGTTCGTATCACTTGCATCATAT | 153          |           |            |       |
| Query 138     | GTTTTACTTGT-GTTGG-TTC-ACAACATCAATGAGTTCATCTAAAGCAAGCAATTTCT  | 194          |           |            |       |
| Sbjct 152     | GTTTTACTTGTGTTGGTTTNCACACTATCAATGAGTTCATCTAAAGCAAGCAATTTCT   | 93           |           |            |       |

3) GAN14SU02ECA9M. Sequence ID: **gnl|SRA|SRR644608.4046991.2** Length: 496 Number of Matches: 1  
Range 1: 391 to 482

| Score        | Expect                                                      | Identities | Gaps     | Strand    | Frame |
|--------------|-------------------------------------------------------------|------------|----------|-----------|-------|
| 134 bits(72) | 4e-27()                                                     | 87/93(94%) | 6/93(6%) | Plus/Plus |       |
| Query 92     | GAAATGAAGT-C--TCGTTGG-AACTGGGGTTCATCACTTGCATCATATGTTTTACTTG | 147        |          |           |       |
| Sbjct 391    | GAAATGAAGTCCGGTTCGTTGGAACTGGGGTTCATCACTTGCATCATATGTTTTACTTG | 450        |          |           |       |
| Query 148    | TGTTGGTTCACAACATCAATGAGTTCA-TCTA                            | 179        |          |           |       |
| Sbjct 451    | TGTTGGTTCACA-CTATCAATGAGTTCACTCTA                           | 482        |          |           |       |

4) GAN14SU06HEXAL. Sequence ID: **gnl|SRA|SRR644608.4390352.2** Length: 493 Number of Matches: 1  
Range 1: 325 to 456 [\[truncated 340-456\]](#)

| Score         | Expect                                                       | Identities   | Gaps      | Strand     | Frame |
|---------------|--------------------------------------------------------------|--------------|-----------|------------|-------|
| 193 bits(104) | 6e-45()                                                      | 126/135(93%) | 7/135(5%) | Plus/Minus |       |
| Query 82      | AGGGAG-CAATGAAATGAAGTCTCGTTGG-AACT-GGGGTTCATCACTTGC-ATCATAT  | 137          |           |            |       |
| Sbjct 456     | AGGGAGACAATGAAATGAAGTCTC-TTGGAACTCGGGTTCATCACTTGCATCATAT     | 398          |           |            |       |
| Query 138     | GTTTTACTTGTGTTGGTTCACAACATCAATGAGTTCATCTAAAGCAAGCAATTTCTCTG  | 197          |           |            |       |
| Sbjct 397     | CGTTTACTTGTGTTGG-TCAC-ACTATCAATGAGTTCATCTAAAGCAAGCAATTTCTCTG | 340          |           |            |       |

5) ERX145715 [From: Expt 2]. Sequence ID: **gnl|SRA|ERR169825.197680.1** Length: 886 Number of Matches: 1  
Range 1: 498 to 813 [\[truncated 694-813\]](#)

| Score         | Expect                                                       | Identities   | Gaps        | Strand     | Frame |
|---------------|--------------------------------------------------------------|--------------|-------------|------------|-------|
| 326 bits(176) | 5e-88()                                                      | 276/317(87%) | 38/317(11%) | Plus/Minus |       |
| Query 91      | TGAAA-TGAA-G-TCTCG-TTGG--AA-CTGGGG-TTC---TA-TCAC--TTG-CA-TCA | 134          |             |            |       |
| Sbjct 813     | TGAAATTGAAGTTCCTCGTTTGGTAACCTGGGGTTCGTTTATTCATTTTGTCAATCA    | 754          |             |            |       |
| Query 135     | TATG--TTTTAC-TTG-TGTT--GG-TTC-ACAAC-ATCAATGAG-TTCATCTAAAG-C  | 183          |             |            |       |
| Sbjct 753     | TATGTTTTTACTTTGTTGTTAGGGTTTCTACAACATCAATGAGTTTCATCTAAAGAC    | 694          |             |            |       |
